# Supplementary figures and images for: The relationship between cardiac and liver iron evaluated by MR imaging in haematological malignancies and chronic liver disease
Source: PubMed Central journal article supplement — Blood Cancer J. 2012 Jan 13;2(1):e49–. doi: 10.1038/bcj.2011.48 (PMC3270252; doi:10.1038/bcj.2011.48), 2012-01-13

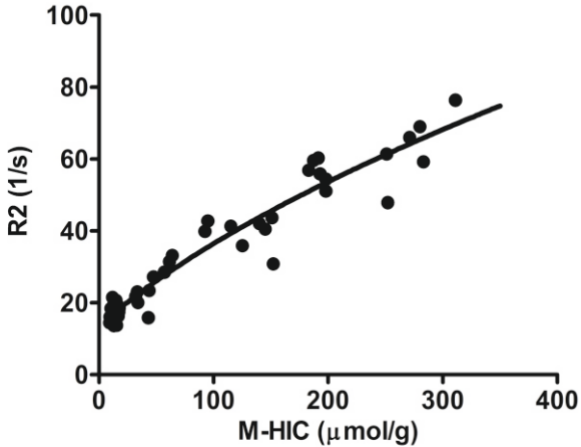

Supplement: bcj201148x1.pdf [file bcj201148x1.pdf]
